# Supplementary material for: Dual-pH responsive host–guest complexation between a water-soluble pillar[9]arene and a 2,7-diazapyrenium salt
Source: Royal Society of Chemistry journal article supplement (doi:10.1039/c6qo00579a), 2016-10-26
Supplement: c6qo00579a1.pdf [file c6qo00579a1.pdf]

## Dual-pH responsive host–guest complexation between a water-soluble pillar[9]arene and a 2,7-diazapyrenium salt

Zhengtao Li, Guocan Yu and Jie Yang\*

Department of Chemistry, Zhejiang University, Hangzhou 310027, P. R. China; Fax: +86-571-8795-3189; Tel:  
+86-571-8795-3189; E-mail: [jieyang@zju.edu.cn](mailto:jieyang@zju.edu.cn)

### Electronic Supplementary Information (8 pages)

|                                                                                                       |    |
|-------------------------------------------------------------------------------------------------------|----|
| 1. <i>Materials and methods</i>                                                                       | S2 |
| 2. <i>Partial <sup>1</sup>H NMR spectra of WP9⊃G1</i>                                                 | S3 |
| 3. <i>Fluorescence titration experiments of WP9 and G1 in H<sub>2</sub>O</i>                          | S4 |
| 4. <i>UV-vis spectroscopy investigations of the complexation between WP9 and G1 in H<sub>2</sub>O</i> | S6 |
| 5. <i>Photographs of dual-pH controlled experiments</i>                                               | S7 |
| 6. <i>Electrospray ionization mass spectra of WP9 and G in H<sub>2</sub>O</i>                         | S8 |
| <i>References</i>                                                                                     | S8 |

## *1. Materials and methods*

All reagents were commercially available and used as supplied without further purification. Solvents were either employed as purchased or dried according to procedures described in the literature. Compounds **WP9**<sup>S1</sup> and **G1**<sup>S2</sup> were synthesized according to published literature procedures. NMR spectra were recorded with a Bruker Avance DMX 500 spectrophotometer with the deuterated solvent as the lock and the residual solvent or TMS as the internal reference. Low-resolution electrospray ionization mass spectra (LRESI-MS) were obtained on a Bruker Esquire 3000 Plus spectrometer (Bruker-Franzen Analytik GmbH Bremen, Germany) equipped with an ESI interface and an ion trap analyzer. UV-vis spectroscopy was performed on a Shimadzu UV-2550 instrument at room temperature. The fluorescence experiments were conducted on a RF-5301 spectrofluorophotometer (Shimadzu Corporation, Japan).

2. Partial  $^1\text{H}$  NMR spectra of  $\text{WP9} \rightleftharpoons \text{G1}$

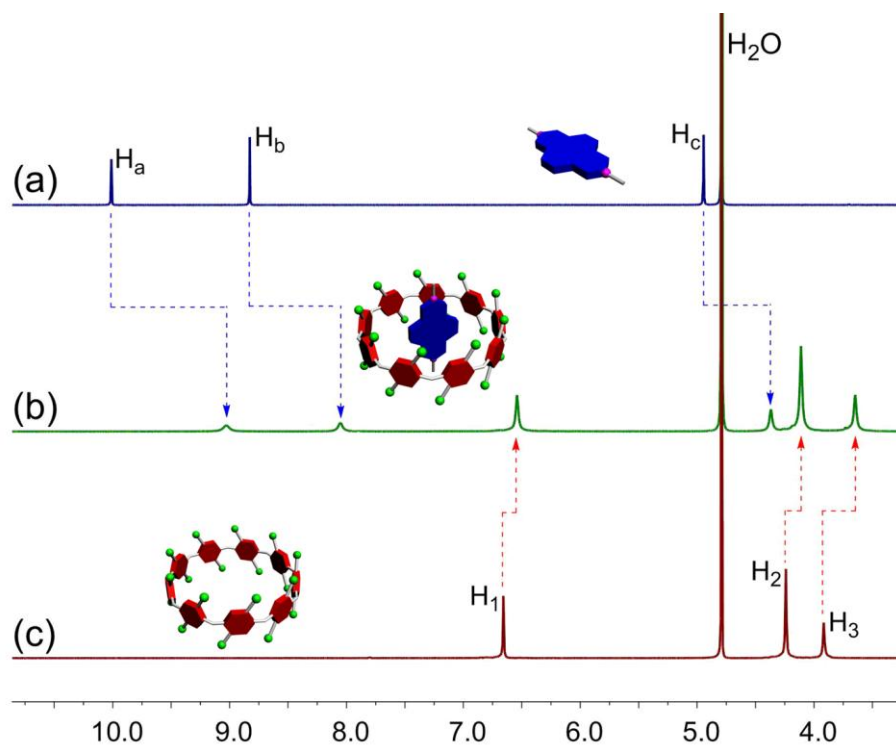

**Figure S1.** Partial  $^1\text{H}$  NMR spectra (500 MHz,  $\text{D}_2\text{O}$ , 293 K): (a) **G1** (2.00 mM); (b) **WP9** (2.00 mM) and **G1** (2.00 mM); (c) **WP9** (2.00 mM).

### 3. Fluorescence titration experiments of **WP9** and **G1** in $H_2O$

To determine the stoichiometry and association constant for the complexation between **WP9** and **G1**, fluorescence titration experiments were done with solutions which had a constant concentration of **G1** ( $1.00 \times 10^{-6}$  M) and varying concentrations of **WP9**. By a non-linear curve-fitting method, the association constant ( $K_a$ ) of **WP9** $\rightarrow$ **G1** was determined. By a mole ratio plot, 1:1 stoichiometry was obtained for the complexation between **WP9** and **G1**.

The non-linear curve-fittings were based on the equation:

$$\Delta F = (\Delta F_\infty/[G]_0) (0.5[H]_0 + 0.5([G]_0 + 1/K_a) - (0.5([H]_0^2 + (2[H]_0(1/K_a - [G]_0) + (1/K_a + [G]_0)^2)^{0.5}))$$

Where  $\Delta F$  is the fluorescence intensity changes at 426 nm at  $[H]_0$ ,  $\Delta F_\infty$  is the fluorescence intensity changes at 426 nm when **WP9** is completely complexed,  $[H]_0$  is the initial concentration of **WP9**, and  $[G]_0$  is the fixed initial concentration of **G1**.

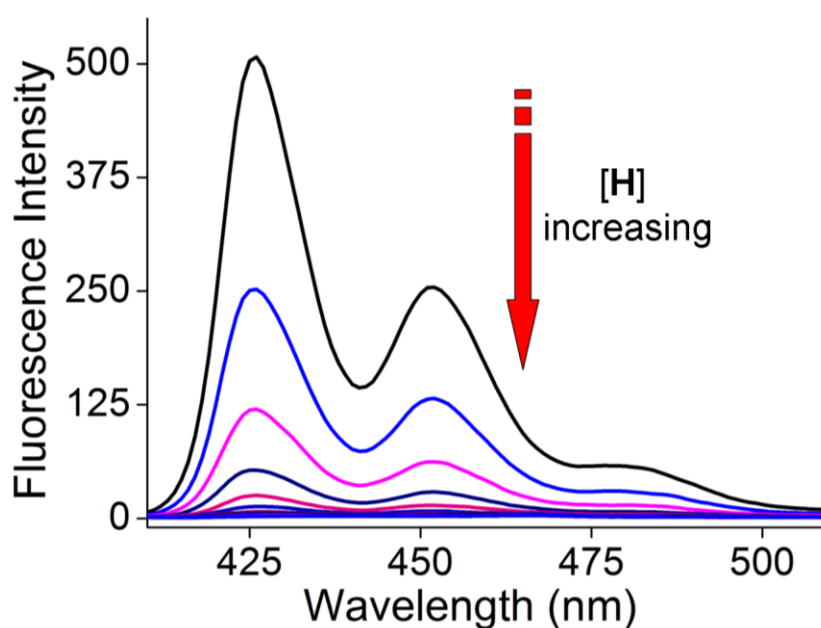

**Figure S2.** Fluorescence spectra of **G1** at a concentration of  $1.00 \times 10^{-6}$  M in water at room temperature upon addition of **WP9** (from 0 to  $2.67 \times 10^{-5}$  M).

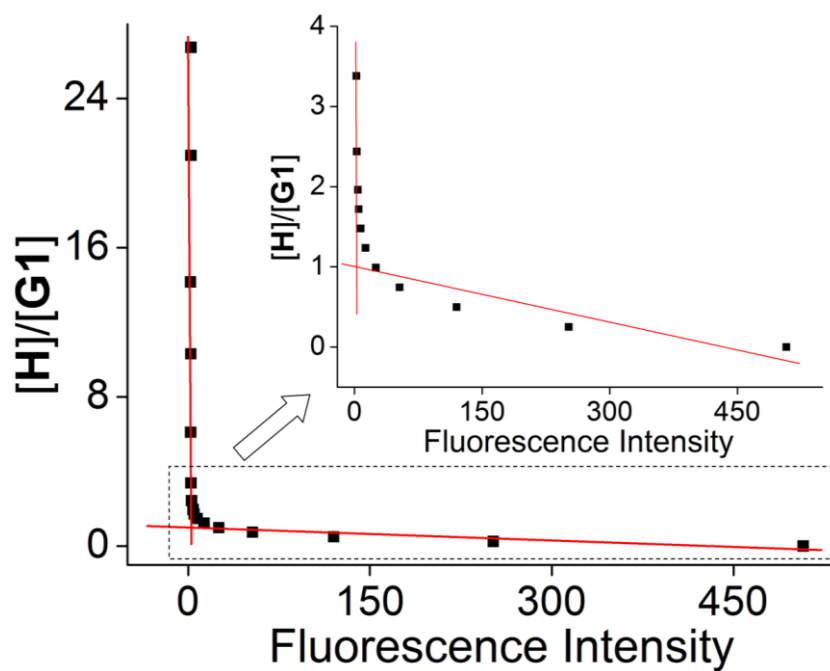

**Figure S3.** Mole ratio plot for **WP9** and **G1**, showing a 1:1 complexation stoichiometry.

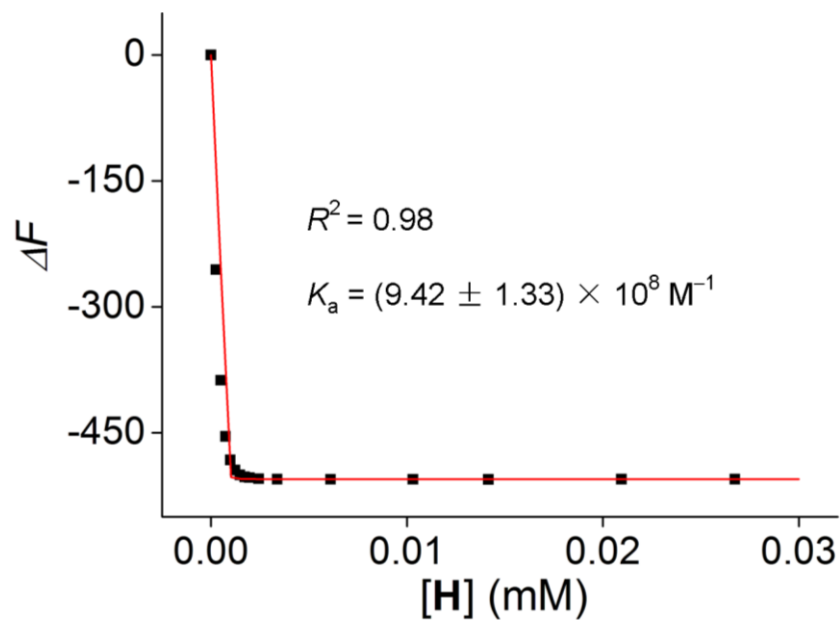

**Figure S4.** The fluorescence intensity changes of **G1** upon addition of **WP9**. The red solid line was obtained from the non-linear curve-fitting method based on the above equation.

4. UV-vis spectroscopy investigations of the complexation between **WP9** and **G1** in  $H_2O$

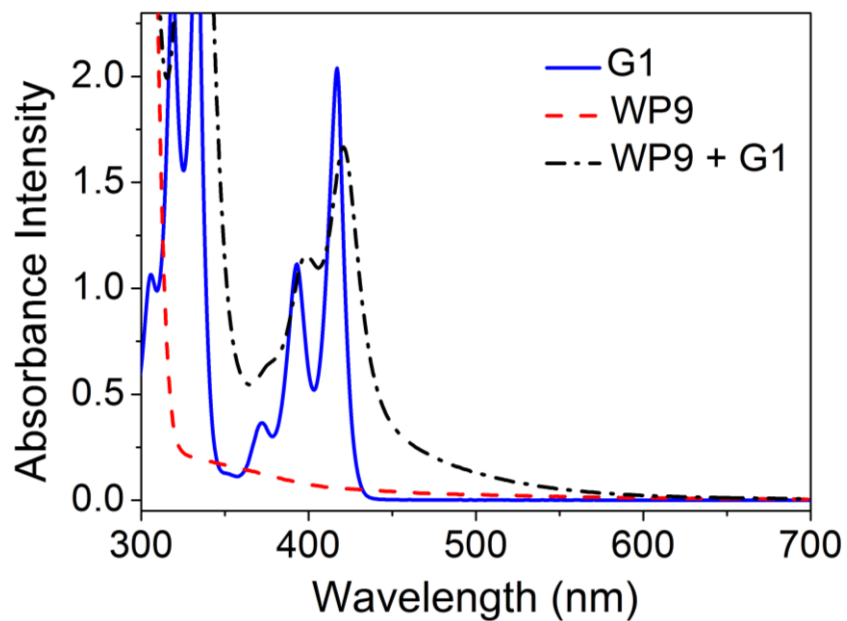

**Figure S5.** UV-vis spectra of **G1** ( $1.00 \times 10^{-4}$  M), **WP9** ( $1.00 \times 10^{-4}$  M) and **WP9** ( $1.00 \times 10^{-4}$  M) with equimolar **G1** in water at room temperature.

5. Photographs of dual-pH controlled experiments

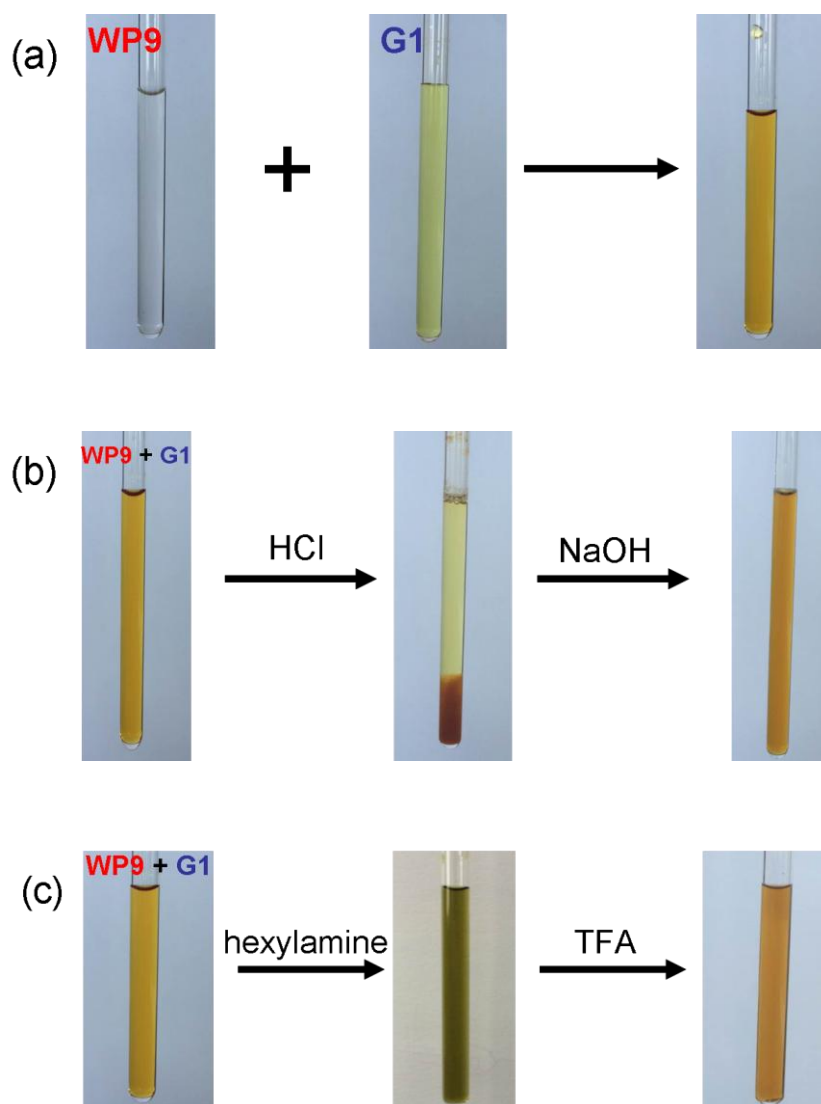

**Figure S6.** Photographs of aqueous solutions: (a) 2.00 mM **G1**, 2.00 mM **WP9** and their mixture; (b) 2.00 mM solution of **G1** and **WP9** upon sequential addition of HCl (20.0 equiv.) and NaOH (20.0 equiv.); (c) 2.00 mM solution of **G1** and **WP9** upon sequential addition of hexylamine (40.0 equiv.) and TFA (40.0 equiv.).

## 6. Electrospray ionization mass spectra of **WP9** and **G1** in $H_2O$

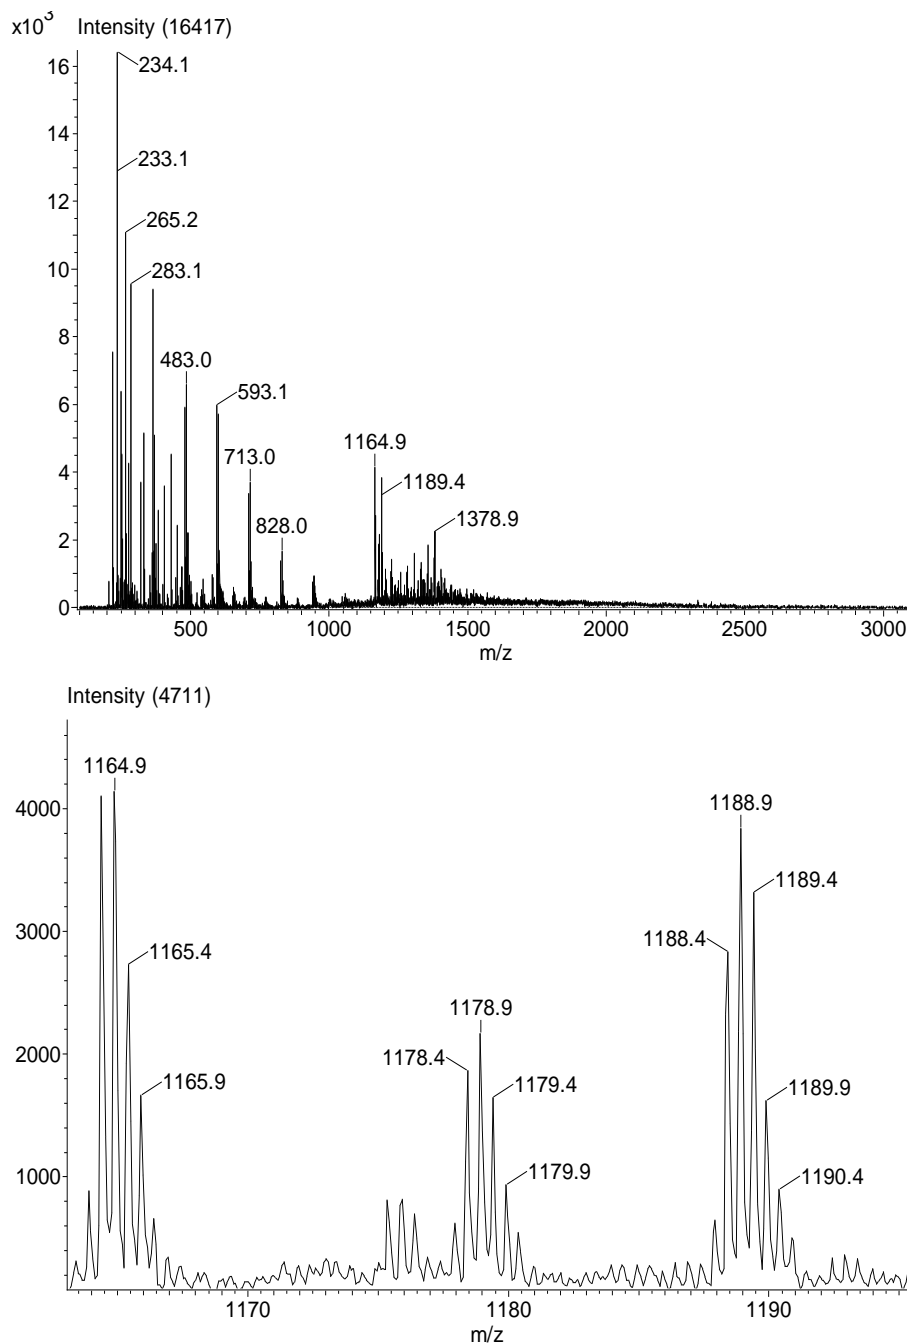

**Figure S7.** Positive electrospray ionization mass spectrum of **WP9** and **G** in  $H_2O$  (upper: full range; bottom: partial range). Mass fragment at  $m/z$  1188.9, corresponding to  $[\mathbf{WP9}\supset\mathbf{G1} - 2I - 18NH_3]^{2+}$ , indicating the 1:1 complexation stoichiometry between **WP9** and **G1**.

### References:

- S1. Z. Li, J. Yang, G. Yu, J. He, Z. Abliz and F. Huang, *Chem. Commun.*, 2014, **50**, 2841–2843.
- S2. M. A. Cejas and F. M. Raymo, *Langmuir*, 2005, **21**, 5795–5802.
